# Supplementary material for: Total joint replacement of the lumbar spine: report of the first two cases with 16 years of follow-up
Source: PubMed Central journal article supplement — J Spine Surg. 2024 Sep 19;10(3):583–9. doi: 10.21037/jss-24-50 (PMC11467273; doi:10.21037/jss-24-50), 2024-09-19
Supplement: jss-10-03-583-rc.pdf [file jss-10-03-583-rc.pdf]

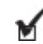

| Topic                            | Item No | Checklist item description                                                                                                                                                     | Reported on Page Number/Line Number | Reported on Section/Paragraph |
|----------------------------------|---------|--------------------------------------------------------------------------------------------------------------------------------------------------------------------------------|-------------------------------------|-------------------------------|
| Title                            | 1       | The diagnosis or intervention of primary focus followed by the words "case report"                                                                                             |                                     |                               |
| Key Words                        | 2       | 2 to 5 key words that identify diagnoses or interventions in this case report, including "case report"                                                                         |                                     |                               |
| Abstract<br>(Structured summary) | 3a      | Background: state what is known and unknown; why the case report is unique and what it adds to existing literature.                                                            |                                     |                               |
|                                  | 3b      | Case Description: describe the patient's demographic details, main symptoms, history, important clinical findings, the main diagnosis, interventions, outcomes and follow-ups. |                                     |                               |
|                                  | 3c      | Conclusions: summarize the main take-away lesson, clinical impact and potential implications.                                                                                  |                                     |                               |
| Introduction                     | 4       | One or two paragraphs summarizing why this case is unique ( <b>may include references</b> )                                                                                    |                                     |                               |
| Patient Information              | 5a      | De-identified patient specific information                                                                                                                                     |                                     |                               |
|                                  | 5b      | Primary concerns and symptoms of the patient                                                                                                                                   |                                     |                               |
|                                  | 5c      | Medical, family, and psycho-social history including relevant genetic information                                                                                              |                                     |                               |
|                                  | 5d      | Relevant past interventions with outcomes                                                                                                                                      |                                     |                               |
| Clinical Findings                | 6       | Describe significant physical examination (PE) and important clinical findings                                                                                                 |                                     |                               |
| Timeline                         | 7       | Historical and current information from this episode of care organized as a timeline                                                                                           |                                     |                               |
| Diagnostic Assessment            | 8a      | Diagnostic testing (such as PE, laboratory testing, imaging, surveys).                                                                                                         |                                     |                               |
|                                  | 8b      | Diagnostic challenges (such as access to testing, financial, or cultural)                                                                                                      |                                     |                               |
|                                  | 8c      | Diagnosis (including other diagnoses considered)                                                                                                                               |                                     |                               |
|                                  | 8d      | Prognosis (such as staging in oncology) where applicable                                                                                                                       |                                     |                               |
| Therapeutic Intervention         | 9a      | Types of therapeutic intervention (such as pharmacologic, surgical, preventive, self-care)                                                                                     |                                     |                               |
|                                  | 9b      | Administration of therapeutic intervention (such as dosage, strength, duration)                                                                                                |                                     |                               |
|                                  | 9c      | Changes in therapeutic intervention (with rationale)                                                                                                                           |                                     |                               |

|                        |     |                                                                                                        |                                                |                                    |
|------------------------|-----|--------------------------------------------------------------------------------------------------------|------------------------------------------------|------------------------------------|
| Follow-up and Outcomes | 10a | Clinician and patient-assessed outcomes (if available)                                                 |                                                |                                    |
|                        | 10b | Important follow-up diagnostic and other test results                                                  |                                                |                                    |
|                        | 10c | Intervention adherence and tolerability (How was this assessed?)                                       |                                                |                                    |
|                        | 10d | Adverse and unanticipated events                                                                       |                                                |                                    |
| Discussion             | 11a | A scientific discussion of the strengths AND limitations associated with this case report              |                                                |                                    |
|                        | 11b | Discussion of the relevant medical literature <b>with references</b>                                   |                                                |                                    |
|                        | 11c | The scientific rationale for any conclusions (including assessment of possible causes)                 |                                                |                                    |
|                        | 11d | The primary “take-away” lessons of this case report (without references) in a one paragraph conclusion |                                                |                                    |
| Patient Perspective    | 12  | The patient should share their perspective in one to two paragraphs on the treatment(s) they received  |                                                |                                    |
| Informed Consent       | 13  | Did the patient give informed consent? Please provide if requested                                     | <b>Yes</b> <input checked="" type="checkbox"/> | <b>No</b> <input type="checkbox"/> |
